# Supplementary material for: Enhanced optical properties of CsPbX3 (X = Cl, Br, and I) perovskite nanocrystal glasses through bismuth doping for light-emitting applications
Source: Royal Society of Chemistry journal article supplement (doi:10.1039/d4tc00130c), 2024-01-01
Supplement: d4tc00130c1.pdf [file d4tc00130c1.pdf]

## Supporting Information

### Enhanced Optical Properties of CsPbX<sub>3</sub> (X = Cl, Br, and I) Perovskite Nanocrystals Glasses through Bismuth Doping for Light-Emitting Application

Liping Wang,<sup>†a</sup> Yuqiong Wang,<sup>†a</sup> Zaiqi Liu,<sup>a</sup> Yu Dong,<sup>a</sup> Puxian Xiong,<sup>c</sup> Chang Xu,<sup>\*a</sup>  
Wen Gao,<sup>\*a</sup> and Bo Tang<sup>\*a, b</sup>

<sup>a</sup>College of Chemistry, Chemical Engineering and Materials Science, Key Laboratory of Molecular and Nano Probes, Ministry of Education, Collaborative Innovation Center of Functionalized Probes for Chemical Imaging in Universities of Shandong, Institutes of Biomedical Sciences, Shandong Normal University, Jinan 250014, China

<sup>b</sup>Laoshan Laboratory, Qingdao 266237, Shandong, China

<sup>c</sup>State Key Laboratory of Luminescent Materials and Devices, South China University of Technology, Guangzhou, 510641, China

Email address: tangb@sdnu.edu.cn; gaowen@sdnu.edu.cn; 621042@sdnu.edu.cn

## Experimental Section

### Chemicals

Silicon dioxide ( $\text{SiO}_2$ , 99%), boron oxide ( $\text{B}_2\text{O}_3$ , 99%), zinc oxide ( $\text{ZnO}$ , 99%), aluminum oxide ( $\text{Al}_2\text{O}_3$ , 99%), bismuth oxide ( $\text{Bi}_2\text{O}_3$ , 99%), sodium chloride ( $\text{NaCl}$ , 99%), sodium bromide ( $\text{NaBr}$ , 99%), sodium iodide ( $\text{NaI}$ , 99.5%) were purchased from Aladdin Reagent. Cesium carbonate ( $\text{Cs}_2\text{CO}_3$ , 99%), lead chloride ( $\text{PbCl}_2$ , 99.5%), lead bromide ( $\text{PbBr}_2$ , 99%), lead iodide ( $\text{PbI}_2$ , 98%) were purchased from Macklin Reagent. All chemicals were used without further purification.

### Synthesis of $\text{Bi}_2\text{O}_3$ doped $\text{CsPbX}_3$ glass sample

All glass samples were prepared using traditional melt quenching and subsequent thermal treatment technique. Borosilicate glass was selected as the glass matrix, and  $\text{NaCl}$ ,  $\text{NaBr}$ ,  $\text{NaI}$ ,  $\text{Cs}_2\text{CO}_3$ ,  $\text{PbCl}_2$ ,  $\text{PbBr}_2$ ,  $\text{PbI}_2$  were used as precursors to introduce  $\text{CsPbX}_3$  ( $X = \text{Cl}, \text{Br}, \text{I}$ ) PNCs into the glass. The raw materials  $\text{SiO}_2$ ,  $\text{B}_2\text{O}_3$ ,  $\text{ZnO}$ ,  $\text{Al}_2\text{O}_3$ ,  $\text{Bi}_2\text{O}_3$ ,  $\text{NaCl}$ ,  $\text{NaBr}$ ,  $\text{NaI}$ ,  $\text{Cs}_2\text{CO}_3$ ,  $\text{PbCl}_2$ ,  $\text{PbBr}_2$ ,  $\text{PbI}_2$  were weighed according to the stoichiometric ratio of  $m\text{SiO}_2-n\text{B}_2\text{O}_3-16\text{ZnO}-9\text{Al}_2\text{O}_3-7\text{Cs}_2\text{CO}_3-14\text{PbX}_2-14\text{NaX}-x\text{Bi}_2\text{O}_3$  ( $m : n = 1.1 : 1$ ,  $X = \text{Cl}, \text{Br}, \text{I}$ ;  $x = 0, 0.05, 0.1, 0.25, 0.5, 0.75, 1.0, 1.5, 2.0, 3.0$  mol%). In the following, sample nomenclature is  $\text{CsPbX}_3 : x\text{Bi}_2\text{O}_3$  ( $X = \text{Cl}, \text{Br}, \text{I}$ ;  $x = 0, 0.05, 0.10, 0.25, 0.50, 0.75, 1.0, 1.5, 2.0, 3.0$  mol%), for instance  $\text{CsPbBr}_3 : 0.1\text{Bi}_2\text{O}_3$  stands for  $20.9\text{SiO}_2-19\text{B}_2\text{O}_3-16\text{ZnO}-9\text{Al}_2\text{O}_3-7\text{Cs}_2\text{CO}_3-14\text{PbBr}_2-$

$14\text{NaBr}-0.1\text{Bi}_2\text{O}_3$ . All the raw materials were manually mixed and ground to powder in the mortar for 20 min., then the glass powders were transferred to the alumina crucible to stand. The crucible was placed in the heating furnace and melted at  $1150\text{ }^\circ\text{C}$  for 15 minutes. The melts obtained were poured onto a preheated brass mould and then pressed against another steel plate to quench. The quenched glasses were then quickly transferred to a muffle furnace for annealing at  $400\text{ }^\circ\text{C}$  for 4 hours to relieve thermal stress. The prepared glass was then annealed at  $480\text{ }^\circ\text{C}$  for 10 h under air conditions. The  $\text{CsPbX}_3$  ( $\text{X} = \text{Cl}, \text{Br}, \text{I}$ ) perovskite nanocrystals (PNCs) were gradually grown, and finally the Bi-doped  $\text{CsPbX}_3$  ( $\text{X} = \text{Cl}, \text{Br}, \text{I}$ ) PNCs glass was successfully prepared by controllable in situ crystallization. All glass samples were cut into  $\sim 10 \times 10 \times 1\text{ mm}^3$  pieces and polished for subsequent optical measurements.

### **Characterization**

The morphology of the sample was observed using a high-resolution transmission electron microscope (TEM, JEM-2100F, JEOL, Japan) operating at 200 kV and equipped with an energy dispersive spectrometry (EDS) detector. Higher magnification TEM images and corresponding elemental distribution was obtained using a spherical aberration electron microscope. The sample utilized for TEM testing finely ground nanoparticles obtained by grinding the block-like glass sample in a mortar. Subsequently, these nanoparticles were further ground for

two hours in an ethyl alcohol solution. The resulting solution was then deposited onto a copper grid for TEM testing. The XRD patterns of the glass samples were determined using an X-ray powder diffractometer (D8 Advance, Bruker, Germany) operating at a scan rate of  $10^\circ/\text{min}$  with a step size of  $0.02^\circ$  and a scan range of  $5-90^\circ$ . Fourier transform infrared (FTIR) spectroscopy was used to observe the microstructure of the glass samples using an FTIR spectrometer (Nicolet Magna 750, Madison, USA) with a scanning range of  $400-4000\text{ cm}^{-1}$ . Absorption spectra were measured using a UV-VIS spectrophotometer (UV-2600, Shimadzu, Japan) in the absorption mode. X-ray photoelectron spectra (XPS) were recorded using a Thermo Scientific K-Alpha XPS system (Thermo Fisher Scientific Inc., Waltham, UK).

Photoluminescence (PL) spectra, excitation spectra were recorded using a spectrophotometer (FLS1000, Edinburgh Instruments, UK) equipped with a 450 W xenon lamp. Fluorescence decay curves were monitored using fluorescence lifetime spectrometer (Hamamatsu Photonics Quantaaurus-Tau C16361-2). The temperature dependent PL spectra were monitored using the same spectrophotometer connected to a self-regulating heater. Photoluminescence quantum yields (PLQYs) were measured using the same fluorescence spectrometer equipped with a barium sulfate coated integrating sphere. The green LED and the red LED were fabricated by coating Bi-doped  $\text{CsPbBr}_3$  PNCs glasses and Bi-doped  $\text{CsPbI}_3$  PNCs glasses based on InGaN chips, respectively.

Colour rendering index (CRI), correlated colour temperature (CCT), luminous efficiency (LE), and Commission Internationale de L'Eclairage (CIE) coordinates of the green LED and the red LED were recorded using an integrated sphere spectroradiometer (HAAS-2000, Everfine, China) under a current of 20 mA. The electroluminescence (EL) properties of the fabricated LEDs were measured using the USB 4000 fiber optic spectrometer (Ocean Optics).

In the fluorescence imaging application, the green emission LED device were prepared and successfully used for fluorescence probe imaging. As illustrated in Fig. S16, a green emission LED was fabricated using a Bi-doped CsPbBr<sub>3</sub> PNCs glass package. The block-shaped Bi-doped CsPbBr<sub>3</sub> PNCs glass was affixed to the surface of the blue LED chip (wavelength: 465 nm) and secured by four small screws. The Bi-doped CsPbBr<sub>3</sub> based LED light source exhibited better focusing ability by covering the reflector cup and convex lens on the glass samples surface. To prevent the accumulation of thermal energy, the device was also equipped with an LED heat sink for thermal dissipation. A miniaturized and portable fluorescence detection device was successfully constructed as shown in Fig. 5k.

## **Supporting Figures and Tables**

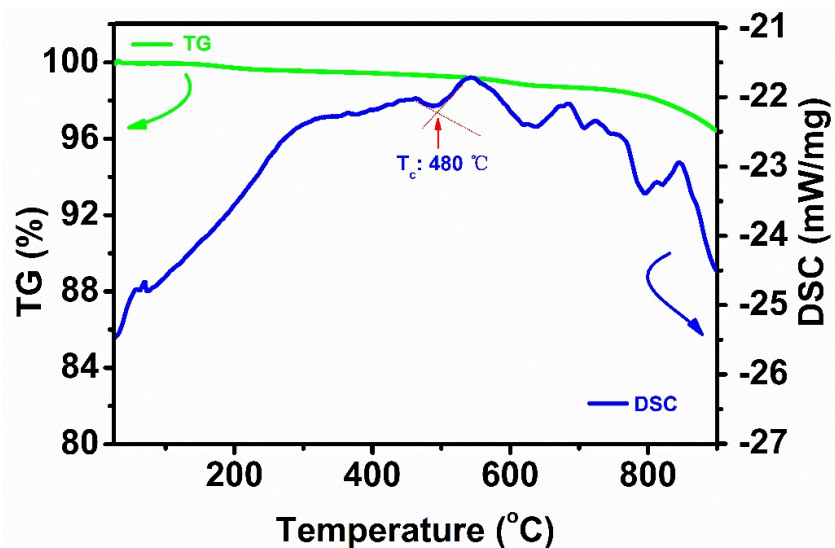

**Fig. S1** TG-DSC curves of the representative CsPbI<sub>3</sub>: 0.5Bi<sub>2</sub>O<sub>3</sub> PNCs glass samples

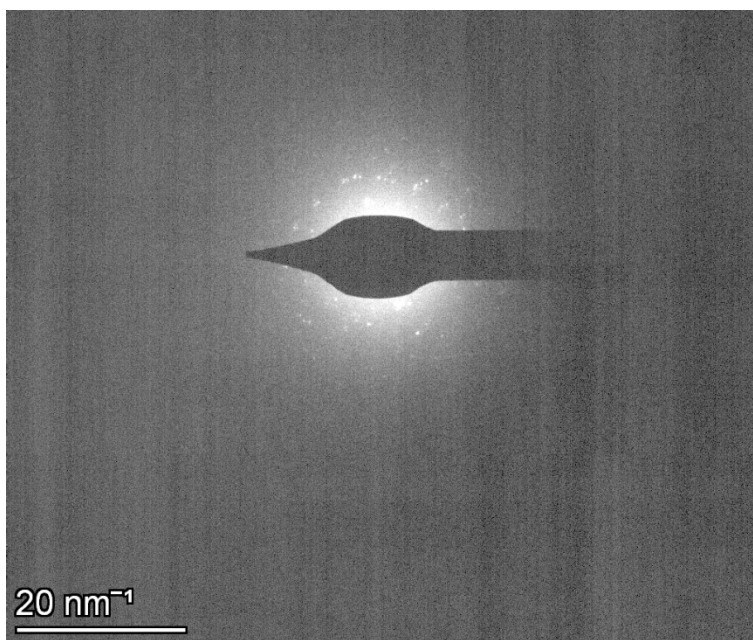

**Fig. S2** Selected area electron diffraction patterns of CsPbI<sub>3</sub>: 0.5 Bi<sub>2</sub>O<sub>3</sub> PNCs glass samples

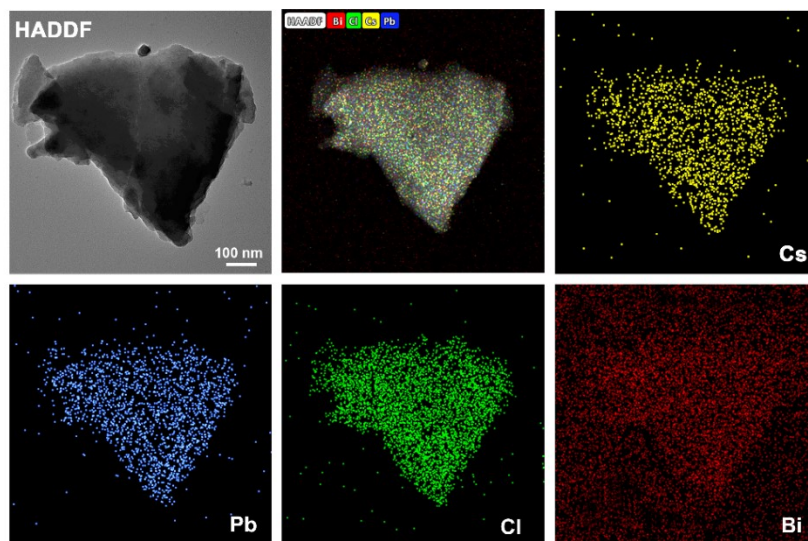

**Fig. S3** EDS elemental mapping of  $\text{CsPbCl}_3: 0.5\text{Bi}_2\text{O}_3$  PNCs glass samples.

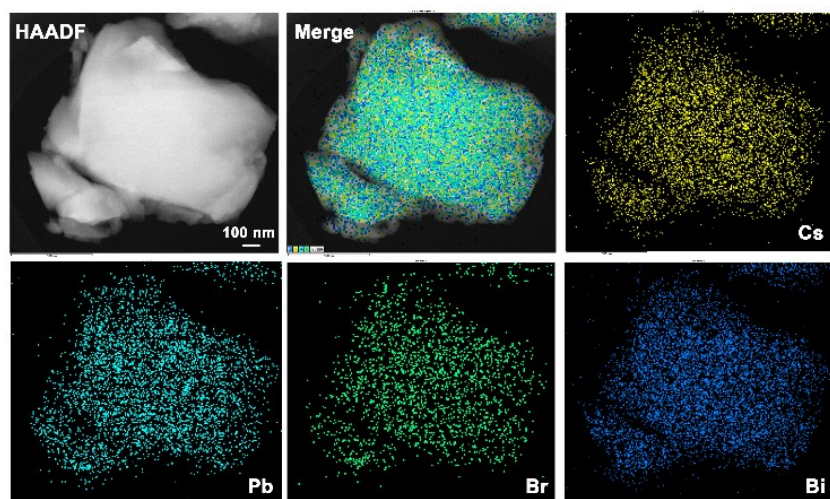

**Fig. S4** EDS elemental mapping of  $\text{CsPbBr}_3: 0.5\text{Bi}_2\text{O}_3$  PNCs glass samples.

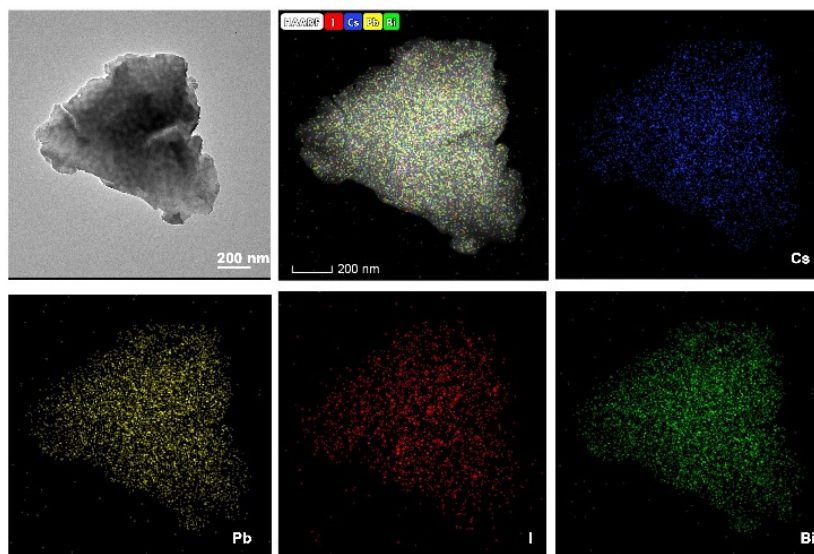

**Fig. S5** EDS elemental mapping of CsPbI<sub>3</sub>: 0.5Bi<sub>2</sub>O<sub>3</sub> PNCs glass samples.

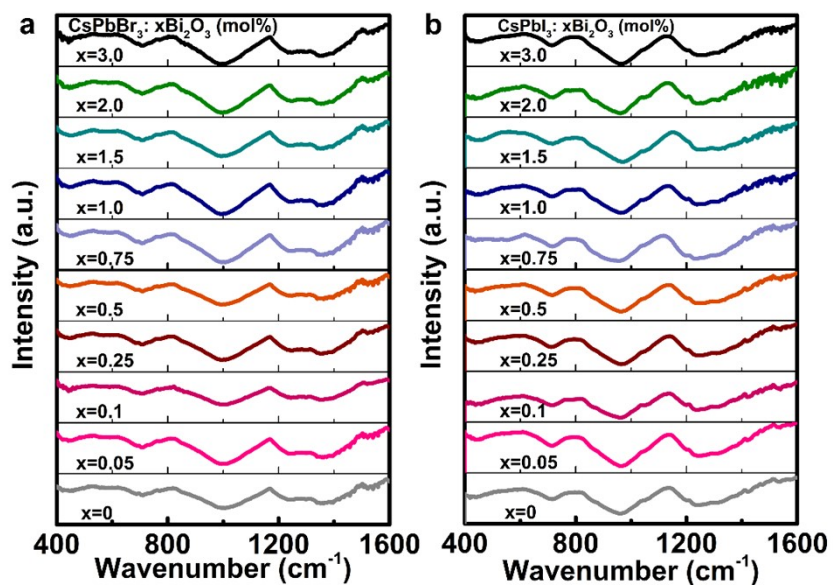

**Fig. S6** FTIR spectra of CsPbBr<sub>3</sub>: xBi<sub>2</sub>O<sub>3</sub> and CsPbI<sub>3</sub>: xBi<sub>2</sub>O<sub>3</sub> (x = 0, 0.05, 0.10, 0.25, 0.50, 0.75, 1.0, 1.5, 2.0, 3.0 mol%) PNCs glass samples.



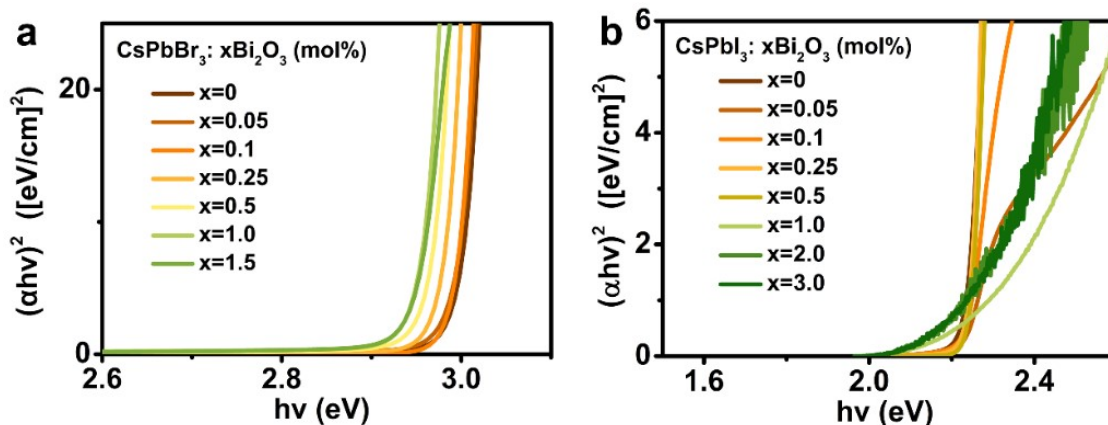

**Fig. S7** The dependence of  $(\alpha hu)^2$  vs.  $hu$  for  $\text{CsPbBr}_3: x\text{Bi}_2\text{O}_3$  and  $\text{CsPbI}_3: x\text{Bi}_2\text{O}_3$  ( $x = 0, 0.05, 0.1, 0.25, 0.5, 0.75, 1.0, 1.5$  mol%) PNCs glasses.

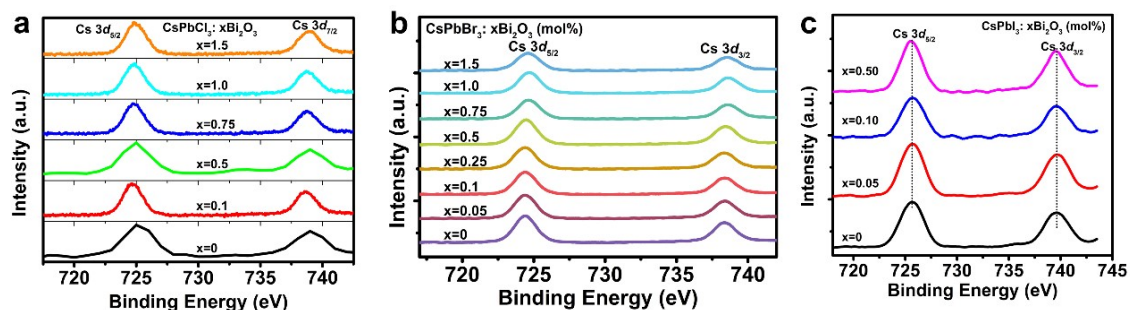

**Fig. S8** High-resolution XPS spectra of Cs 3d from (a)  $\text{CsPbCl}_3: x\text{Bi}_2\text{O}_3$ , (b)  $\text{CsPbBr}_3: x\text{Bi}_2\text{O}_3$ , (c)  $\text{CsPbI}_3: x\text{Bi}_2\text{O}_3$  ( $x = 0, 0.05, 0.10, 0.25, 0.50, 0.75, 1.0, 1.5$  mol%) PNCs glass samples, respectively.

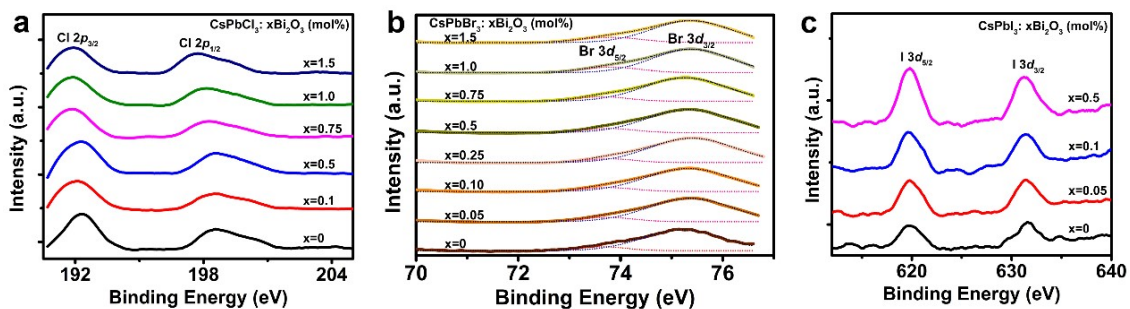

**Fig. S9** High-resolution XPS spectra of (a) Cl 2p, (b) Br 3d and (c) I 3d regions.

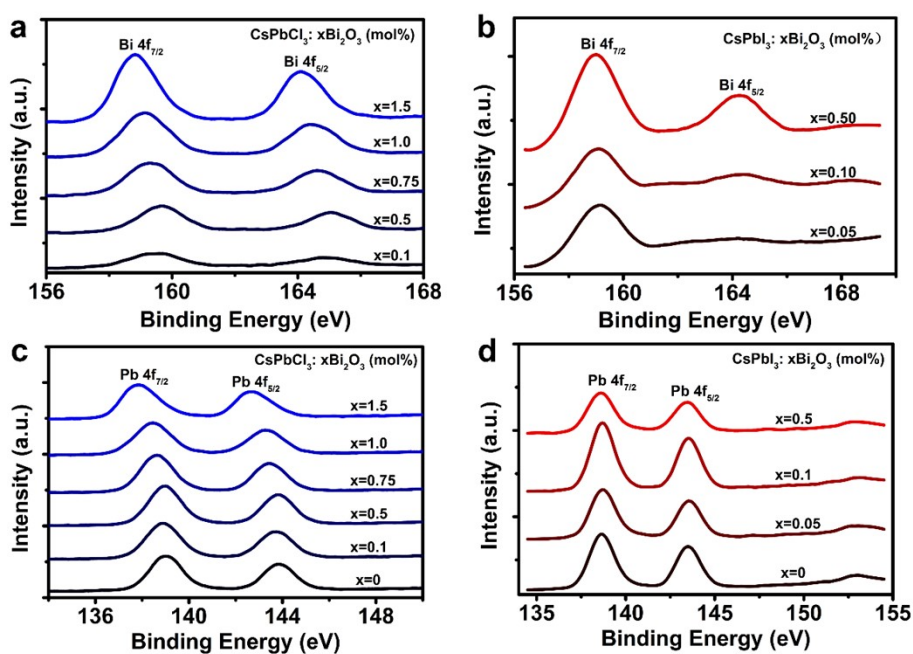

**Fig. S10** High-resolution XPS spectra of (a, b) Bi 2p and (c, d) Pb 4f regions from the CsPbCl<sub>3</sub>:xBi<sub>2</sub>O<sub>3</sub> (x = 0, 0.1, 0.5, 0.75, 1.0, 1.5 mol%) and (b) CsPbI<sub>3</sub>:xBi<sub>2</sub>O<sub>3</sub> (x = 0, 0.05, 0.10, 0.50 mol%) PNCs glass samples.

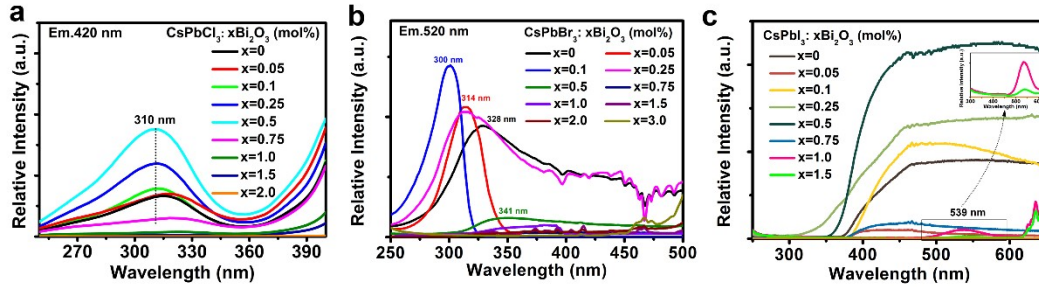

**Fig. S11** Excitation spectra of (a) CsPbCl<sub>3</sub>: xBi<sub>2</sub>O<sub>3</sub> monitored at 420 nm, (b) CsPbBr<sub>3</sub>: xBi<sub>2</sub>O<sub>3</sub> PNCs glass samples monitored at 520 nm and (c) CsPbI<sub>3</sub>: xBi<sub>2</sub>O<sub>3</sub> monitored at 700 nm.

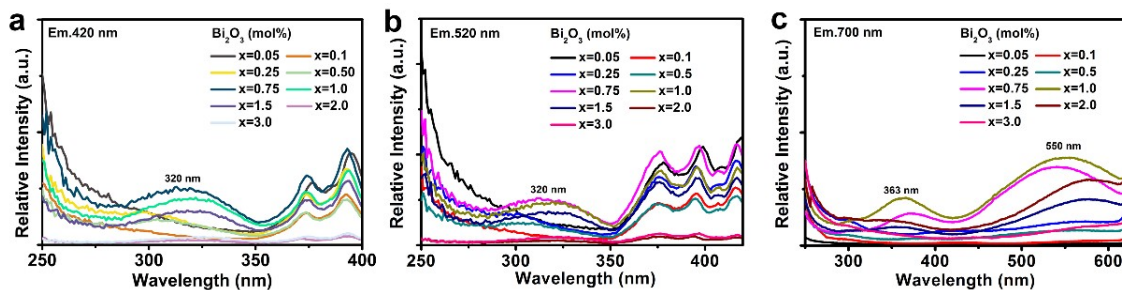

**Fig. S12** Excitation spectra of Bi<sub>2</sub>O<sub>3</sub> doped borosilicate glasses (x = 0.05, 0.10, 0.25, 0.50, 0.75, 1.0, 1.5, 2.0, 3.0 mol%) without introducing CsPbX<sub>3</sub> (X = Cl, Br, I) PNCs glass samples monitored at (a) 420 nm, (b) 520 nm and (c) 700 nm, respectively.

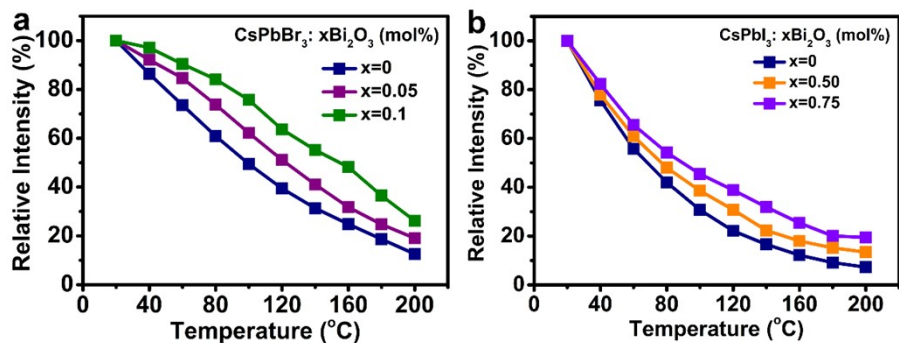

**Fig. S13** Temperature-dependent PL intensities for (a) CsPbBr<sub>3</sub>: xBi<sub>2</sub>O<sub>3</sub> (x = 0, 0.05, 0.10) PNCs glass samples and CsPbI<sub>3</sub>: xBi<sub>2</sub>O<sub>3</sub> PNCs glass samples (x = 0, 0.50, 0.75 mol%) via heating at 20-200 °C.

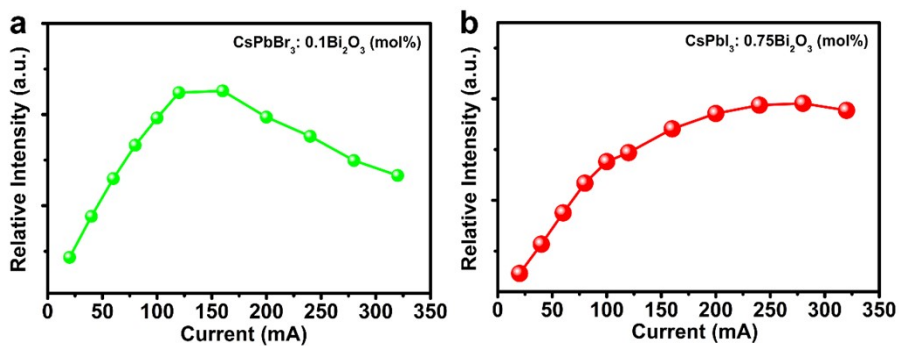

**Fig. S14** Current-dependent EL intensities for (a) CsPbBr<sub>3</sub>: 0.1Bi<sub>2</sub>O<sub>3</sub> PNCs glass samples and CsPbI<sub>3</sub>: 0.75Bi<sub>2</sub>O<sub>3</sub> PNCs glass samples.

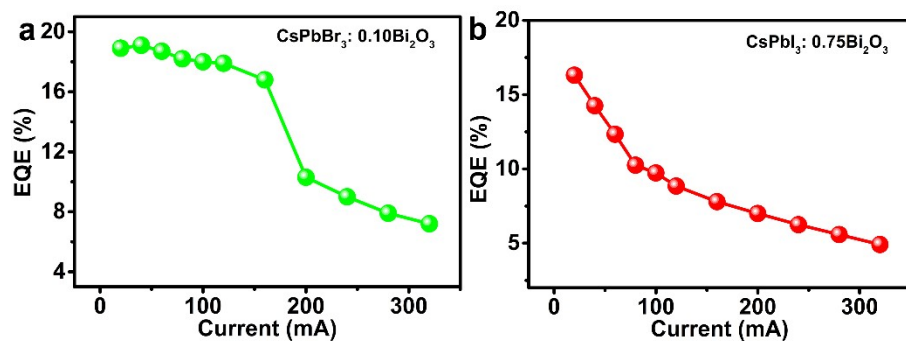

**Fig. S15** Current-dependent external quantum efficiency (EQE) for (a)  $\text{CsPbBr}_3: 0.10\text{Bi}_2\text{O}_3$  PNCs glass samples and  $\text{CsPbI}_3: 0.75\text{Bi}_2\text{O}_3$  PNCs glass samples.

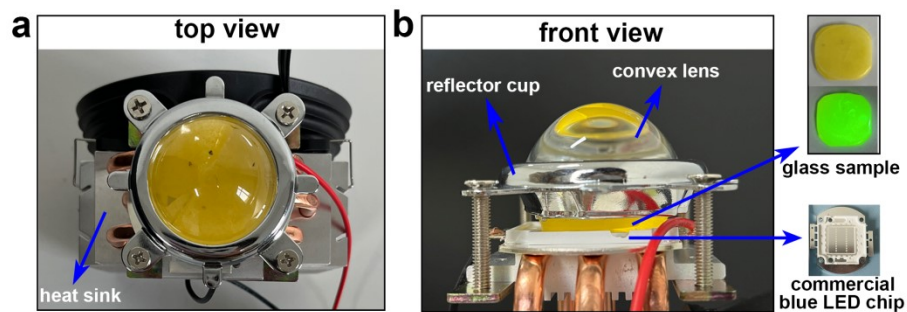

**Fig. S16** The images of a green LED obtained by the encapsulation of Bi-doped  $\text{CsPbBr}_3$  PNCs glass. (a) Top view, (b) Front view

**Table S1.** Absorption bandgaps of Bi doped CsPbX<sub>3</sub> (X = Cl, Br, I) PNCs glass samples (0-1.5 mol%) obtained by extrapolation to  $(\alpha h\nu)^2 = 0$ .

| Bi <sub>2</sub> O <sub>3</sub><br>(x,<br>mol%) | Bandgap (eV)                                             |                                                          |                                                         |
|------------------------------------------------|----------------------------------------------------------|----------------------------------------------------------|---------------------------------------------------------|
|                                                | CsPbCl <sub>3</sub> :<br>xBi <sub>2</sub> O <sub>3</sub> | CsPbBr <sub>3</sub> :<br>xBi <sub>2</sub> O <sub>3</sub> | CsPbI <sub>3</sub> :<br>xBi <sub>2</sub> O <sub>3</sub> |
| 0                                              | 4.60                                                     | 3.02                                                     | 2.23                                                    |
| 0.05                                           | 4.59                                                     | 3.01                                                     | 2.24                                                    |
| 0.10                                           | 4.56                                                     | 3.0                                                      | 2.24                                                    |
| 0.25                                           | 4.55                                                     | 2.99                                                     | 2.24                                                    |
| 0.50                                           | 4.36                                                     | 2.98                                                     | 2.24                                                    |
| 0.75                                           | 4.47                                                     | 2.95                                                     | 2.26                                                    |
| 1.0                                            | 4.41                                                     | 2.96                                                     | 2.28                                                    |
| 1.5                                            | 4.39                                                     | 2.97                                                     |                                                         |
